# Supplementary material for: Changes in Children’s Body Composition and Posture during Puberty Growth
Source: PubMed Central journal article supplement (PMC8068155; doi:10.3390/children8040288), 2021-04-08
Supplement: children-08-00288-s001.pdf [file children-08-00288-s001.pdf]

**Supplementary Table 1.** Regression of factors influencing body posture parameters in children.

| Model                | Non-standard coefficient |       | Standardized coefficient | t     | p     | 95% CI (B) |       | R <sup>2</sup> -corrected |       |
|----------------------|--------------------------|-------|--------------------------|-------|-------|------------|-------|---------------------------|-------|
|                      | B                        | SE    | Beta                     |       |       |            |       |                           |       |
| Total length (mm)    | Body height              | 2.39  | 0.11                     | 0.81  | 21.76 | <0.001     | 2.18  | 2.61                      | 0.853 |
|                      | Body weight              | 0.42  | 0.12                     | 0.13  | 3.62  | <0.001     | 0.19  | 0.65                      |       |
|                      | Sex                      | -3.89 | 1.88                     | -0.04 | -2.06 | 0.040      | -7.59 | -0.18                     |       |
| Thoracic Length (mm) | Body height              | 1.48  | 0.16                     | 0.73  | 9.19  | <0.001     | 1.16  | 1.80                      | 0.649 |
|                      | Body weight              | 0.45  | 0.12                     | 0.21  | 3.64  | <0.001     | 0.20  | 0.69                      |       |
|                      | Age                      | -1.57 | 0.76                     | -0.13 | -2.07 | 0.039      | -3.06 | -0.08                     |       |
| Lumbar Length (mm)   | Body height              | 0.54  | 0.08                     | 0.48  | 6.74  | <0.001     | 0.38  | 0.70                      | 0.557 |
|                      | Age                      | 1.92  | 0.48                     | 0.29  | 4.04  | <0.001     | 0.99  | 2.86                      |       |

It can be seen that the length of the spine depended on height ( $p < 0.001$ ), weight ( $p < 0.001$ ) and sex ( $p = 0.039$ ). Children who were taller (beta = 0.81), heavier (beta = 0.13) and girls (beta = - 0.04) had a longer spine. The second indicator of body posture was the length of the thoracic segment. This length significantly depended on the height, weight and age of the participants. Children who were taller (beta = 0.73), heavier (beta = 0.21) and to a lesser extent, younger children (beta = -0.13) had higher values of the thoracic segment length. The length of the lumbar section increased significantly with the growth (beta = 0.48) and with the age of children (beta = 0.29).

**Supplementary Table 2.** Differences between girls and boys in body posture and body composition parameters before puberty.

| Variables before puberty                   | Girls  |       |        |        |        |    | Boys   |       |        |        |        |     | <i>p</i> |
|--------------------------------------------|--------|-------|--------|--------|--------|----|--------|-------|--------|--------|--------|-----|----------|
|                                            | ×      | SD    | Me     | Min.   | Max.   | N  | ×      | SD    | Me     | Min.   | Maks.  | N   |          |
| <b>Body posture</b>                        |        |       |        |        |        |    |        |       |        |        |        |     |          |
| Total length [mm]                          | 374.27 | 28.88 | 371.00 | 314.00 | 457.00 | 71 | 387.04 | 32.96 | 385.00 | 308.00 | 486.00 | 112 | 0.008    |
| Thoracic Length [mm]                       | 273.59 | 23.23 | 272.00 | 176.00 | 332.00 | 71 | 283.65 | 25.38 | 282.50 | 217.00 | 392.00 | 112 | 0.008    |
| Lumbar Length [mm]                         | 73.28  | 15.59 | 74.00  | 34.00  | 105.00 | 71 | 76.11  | 15.99 | 74.00  | 23.00  | 110.00 | 112 | 0.241    |
| Pelvic torsion [degree]                    | 4.53   | 3.77  | 3.50   | 0.40   | 17.90  | 71 | 3.47   | 3.47  | 2.65   | 0.00   | 29.40  | 112 | 0.053    |
| Pelvic obliquity [degree]                  | 2.30   | 2.12  | 1.70   | 0.10   | 8.10   | 71 | 2.45   | 1.81  | 2.30   | 0.00   | 7.70   | 112 | 0.605    |
| Pelvic/shoulder obliquity [degree]         | 2.45   | 1.90  | 2.00   | 0.00   | 8.90   | 71 | 2.93   | 2.21  | 2.60   | 0.00   | 10.40  | 112 | 0.139    |
| Scapula distance RIGHT [mm]                | 38.83  | 12.92 | 40.00  | 10.00  | 69.00  | 71 | 42.32  | 13.10 | 41.50  | 11.00  | 84.00  | 112 | 0.079    |
| Scapula distance LEFT [mm]                 | 50.01  | 78.11 | 40.00  | 14.00  | 688.00 | 71 | 42.96  | 11.77 | 42.00  | 15.00  | 78.00  | 112 | 0.348    |
| Scapula distance difference [mm]           | 7.54   | 6.73  | 6.00   | 0.00   | 32.00  | 71 | 7.58   | 7.01  | 6.00   | 0.00   | 41.00  | 112 | 0.966    |
| Pelvic height difference RIGHT [mm]        | 1.87   | 3.18  | 0.00   | 0.00   | 12.10  | 71 | 4.92   | 6.36  | 0.30   | 0.00   | 23.20  | 112 | <0.001   |
| Pelvic height difference LEFT [mm]         | 5.61   | 7.33  | 2.20   | 0.00   | 24.10  | 71 | 4.04   | 6.65  | 0.00   | 0.00   | 32.40  | 112 | 0.136    |
| Shoulder height difference RIGHT [mm]      | 3.94   | 3.23  | 2.90   | 0.20   | 14.90  | 29 | 6.08   | 4.34  | 5.40   | 0.10   | 19.30  | 33  | 0.033    |
| Shoulder height difference LEFT [mm]       | 13.72  | 8.37  | 14.00  | 0.70   | 32.80  | 42 | 10.97  | 8.87  | 8.40   | 0.10   | 39.90  | 79  | 0.101    |
| Lateral inclination LEFT [degree]          | 0.98   | 1.16  | 0.50   | 0.00   | 4.90   | 71 | 0.86   | 1.20  | 0.10   | 0.00   | 6.20   | 112 | 0.528    |
| Lateral inclination RIGHT [degree]         | 0.31   | 0.66  | 0.00   | 0.00   | 2.90   | 71 | 0.60   | 0.92  | 0.00   | 0.00   | 4.40   | 112 | 0.016    |
| <b>Body composition</b>                    |        |       |        |        |        |    |        |       |        |        |        |     |          |
| Right Leg FAT [%]                          | 29.99  | 5.55  | 29.60  | 8.50   | 48.30  | 71 | 26.23  | 5.99  | 25.40  | 5.90   | 47.80  | 112 | 0.132    |
| Left Leg FAT [%]                           | 30.64  | 4.90  | 29.80  | 23.80  | 50.30  | 71 | 26.71  | 6.05  | 25.95  | 6.40   | 47.90  | 112 | <0.001   |
| Right Arm FAT [%]                          | 33.18  | 5.56  | 32.50  | 26.10  | 57.80  | 71 | 29.97  | 4.76  | 29.25  | 17.60  | 47.20  | 112 | <0.001   |
| Left Arm FAT [%]                           | 33.69  | 5.64  | 33.30  | 26.00  | 53.70  | 71 | 30.76  | 5.31  | 29.95  | 15.60  | 51.40  | 112 | <0.001   |
| Trunk FAT [%]                              | 15.95  | 6.47  | 14.90  | 3.00   | 41.70  | 71 | 14.59  | 5.55  | 13.00  | 3.00   | 34.90  | 112 | <0.001   |
| The content of adipose tissue in % (FAT %) | 22.05  | 5.29  | 20.50  | 15.20  | 42.80  | 71 | 20.03  | 5.53  | 18.55  | 6.70   | 40.70  | 112 | 0.016    |
| Lean tissue in kg (FFM kg)                 | 77.94  | 5.31  | 79.44  | 57.14  | 84.62  | 71 | 79.97  | 5.55  | 81.27  | 59.22  | 93.21  | 112 | 0.015    |
| Total water content in % (TBW %)           | 57.06  | 3.89  | 58.06  | 41.82  | 61.99  | 71 | 58.54  | 4.06  | 59.56  | 43.38  | 68.33  | 112 | 0.015    |
| Muscle tissue in kg (PMM kg)               | 73.82  | 5.01  | 75.40  | 54.17  | 80.09  | 71 | 75.49  | 5.18  | 76.83  | 55.97  | 87.78  | 112 | 0.033    |

*p* - t-test for independent groups (taking into account the correction resulting from the homogeneity of variance (homogeneity was calculated using Levene's test))

**Supplementary Table 3.** Differences between girls and boys in body posture and body composition parameters after puberty.

| Variables in puberty                       | Girls  |       |        |        |        |     | Boys   |       |        |        |        |     | P      |
|--------------------------------------------|--------|-------|--------|--------|--------|-----|--------|-------|--------|--------|--------|-----|--------|
|                                            | x      | SD    | Me     | Min.   | Max.   | N   | x      | SD    | Me     | Min.   | Maks.  | N   |        |
| <b>Body posture</b>                        |        |       |        |        |        |     |        |       |        |        |        |     |        |
| Total length [mm]                          | 450.22 | 32.18 | 454.00 | 358.00 | 522.00 | 159 | 476.97 | 38.38 | 480.50 | 377.00 | 561.00 | 122 | <0.001 |
| Thoracic Length [mm]                       | 318.78 | 27.47 | 318.00 | 241.00 | 391.00 | 159 | 335.89 | 29.22 | 335.50 | 268.00 | 404.00 | 122 | <0.001 |
| Lumbar Length [mm]                         | 96.84  | 15.22 | 97.00  | 51.00  | 133.00 | 159 | 103.96 | 16.09 | 102.00 | 54.00  | 143.00 | 122 | <0.001 |
| Pelvic torsion [degree]                    | 3.36   | 3.10  | 2.70   | 0.00   | 21.00  | 159 | 3.71   | 3.55  | 2.90   | 0.00   | 18.80  | 122 | 0.377  |
| Pelvic obliquity [degree]                  | 1.92   | 1.68  | 1.50   | 0.00   | 8.50   | 159 | 1.94   | 1.59  | 1.55   | 0.00   | 8.30   | 122 | 0.942  |
| Pelvic/shoulder obliquity [degree]         | 2.35   | 1.83  | 1.80   | 0.10   | 9.20   | 159 | 4.12   | 14.89 | 2.40   | 0.00   | 165.50 | 122 | 0.139  |
| Scapula distance RIGHT [mm]                | 44.77  | 12.43 | 44.00  | 10.00  | 88.00  | 159 | 55.93  | 13.63 | 56.50  | 26.00  | 91.00  | 122 | <0.001 |
| Scapula distance LEFT [mm]                 | 43.57  | 12.73 | 44.00  | 15.00  | 89.00  | 159 | 53.66  | 13.12 | 54.00  | 25.00  | 83.00  | 122 | <0.001 |
| Scapula distance difference [mm]           | 6.67   | 5.38  | 5.00   | 0.00   | 27.00  | 159 | 6.81   | 5.91  | 5.00   | 0.00   | 28.00  | 122 | 0.838  |
| Pelvic height difference RIGHT [mm]        | 4.74   | 7.04  | 1.00   | 0.00   | 29.90  | 158 | 4.98   | 7.53  | 0.40   | 0.00   | 37.40  | 122 | 0.780  |
| Pelvic height difference LEFT [mm]         | 3.54   | 6.05  | 0.00   | 0.00   | 29.20  | 159 | 3.93   | 6.13  | 0.00   | 0.00   | 32.80  | 122 | 0.588  |
| Shoulder height difference RIGHT [mm]      | 7.47   | 6.07  | 5.70   | 0.10   | 25.40  | 54  | 7.48   | 5.42  | 6.80   | 1.30   | 26.10  | 34  | 0.995  |
| Shoulder height difference LEFT [mm]       | 11.06  | 7.82  | 9.75   | 0.10   | 41.80  | 104 | 11.75  | 8.84  | 10.65  | 0.50   | 59.80  | 88  | 0.567  |
| Lateral inclination LEFT [degree]          | 0.62   | 0.90  | 0.10   | 0.00   | 5.10   | 158 | 0.79   | 1.06  | 0.30   | 0.00   | 6.40   | 122 | 0.154  |
| Lateral inclination RIGHT [degree]         | 0.60   | 0.91  | 0.00   | 0.00   | 4.50   | 159 | 0.54   | 0.89  | 0.00   | 0.00   | 3.60   | 122 | 0.594  |
| <b>Body composition</b>                    |        |       |        |        |        |     |        |       |        |        |        |     |        |
| Right Leg FAT [%]                          | 31.19  | 4.74  | 30.90  | 22.40  | 48.40  | 159 | 21.45  | 6.11  | 19.85  | 11.20  | 44.10  | 122 | <0.001 |
| Left Leg FAT [%]                           | 31.46  | 4.77  | 31.10  | 23.10  | 49.60  | 159 | 22.04  | 6.09  | 20.15  | 11.90  | 43.40  | 122 | <0.001 |
| Right Arm FAT [%]                          | 32.92  | 4.87  | 32.70  | 16.40  | 55.30  | 159 | 25.44  | 5.60  | 24.70  | 14.60  | 45.40  | 122 | <0.001 |
| Left Arm FAT [%]                           | 35.74  | 5.99  | 35.70  | 23.10  | 61.10  | 159 | 26.66  | 6.23  | 25.35  | 17.20  | 52.00  | 122 | <0.001 |
| Trunk FAT [%]                              | 18.86  | 5.99  | 18.30  | 6.40   | 42.40  | 159 | 14.93  | 6.26  | 13.20  | 5.60   | 40.50  | 122 | <0.001 |
| The content of adipose tissue in % (FAT %) | 24.82  | 5.42  | 24.40  | 14.90  | 46.90  | 159 | 18.63  | 5.91  | 16.80  | 10.50  | 41.00  | 122 | <0.001 |
| Lean tissue in kg (FFM kg)                 | 75.18  | 5.42  | 75.58  | 53.08  | 84.97  | 159 | 81.23  | 6.22  | 83.18  | 59.05  | 89.35  | 122 | <0.001 |
| Total water content in % (TBW %)           | 55.03  | 3.97  | 55.33  | 38.81  | 62.27  | 159 | 59.46  | 4.55  | 60.88  | 43.27  | 65.29  | 122 | <0.001 |
| Muscle tissue in kg (PMM kg)               | 71.32  | 5.12  | 71.72  | 50.41  | 80.67  | 159 | 77.08  | 5.88  | 78.98  | 56.03  | 84.54  | 122 | <0.001 |

*p* - t-test for independent groups (taking into account the correction resulting from the homogeneity of variance (homogeneity was calculated using Levene's test))

**Supplementary Table 4.** Differences in girl's body posture and body composition parameters before and after puberty.

| Variables                                  | Girls before puberty |       |        |        |        |    | Girls after puberty |       |        |        |        |     | p      |
|--------------------------------------------|----------------------|-------|--------|--------|--------|----|---------------------|-------|--------|--------|--------|-----|--------|
|                                            | x                    | SD    | Me     | Min.   | Max.   | N  | x                   | SD    | Me     | Min.   | Maks.  | N   |        |
| <b>Body posture</b>                        |                      |       |        |        |        |    |                     |       |        |        |        |     |        |
| Total length [mm]                          | 374.27               | 28.88 | 371.00 | 314.00 | 457.00 | 71 | 450.22              | 32.18 | 454.00 | 358.00 | 522.00 | 159 | <0.001 |
| Thoracic Length [mm]                       | 273.59               | 23.23 | 272.00 | 176.00 | 332.00 | 71 | 318.78              | 27.47 | 318.00 | 241.00 | 391.00 | 159 | <0.001 |
| Lumbar Length [mm]                         | 73.28                | 15.59 | 74.00  | 34.00  | 105.00 | 71 | 96.84               | 15.22 | 97.00  | 51.00  | 133.00 | 159 | <0.001 |
| Pelvic torsion [degree]                    | 4.53                 | 3.77  | 3.50   | 0.40   | 17.90  | 71 | 3.36                | 3.10  | 2.70   | 0.00   | 21.00  | 159 | 0.015  |
| Pelvic obliquity [degree]                  | 2.30                 | 2.12  | 1.70   | 0.10   | 8.10   | 71 | 1.92                | 1.68  | 1.50   | 0.00   | 8.50   | 159 | 0.188  |
| Pelvic/shoulder obliquity [degree]         | 2.45                 | 1.90  | 2.00   | 0.00   | 8.90   | 71 | 2.35                | 1.83  | 1.80   | 0.10   | 9.20   | 159 | 0.690  |
| Scapula distance RIGHT [mm]                | 38.83                | 12.92 | 40.00  | 10.00  | 69.00  | 71 | 44.77               | 12.43 | 44.00  | 10.00  | 88.00  | 159 | 0.001  |
| Scapula distance LEFT [mm]                 | 50.01                | 78.11 | 40.00  | 14.00  | 688.00 | 71 | 43.57               | 12.73 | 44.00  | 15.00  | 89.00  | 159 | 0.492  |
| Scapula distance difference [mm]           | 7.54                 | 6.73  | 6.00   | 0.00   | 32.00  | 71 | 6.67                | 5.38  | 5.00   | 0.00   | 27.00  | 159 | 0.301  |
| Pelvic height difference RIGHT [mm]        | 1.87                 | 3.18  | 0.00   | 0.00   | 12.10  | 71 | 4.74                | 7.04  | 1.00   | 0.00   | 29.90  | 158 | <0.001 |
| Pelvic height difference LEFT [mm]         | 5.61                 | 7.33  | 2.20   | 0.00   | 24.10  | 71 | 3.54                | 6.05  | 0.00   | 0.00   | 29.20  | 159 | 0.039  |
| Shoulder height difference RIGHT [mm]      | 3.94                 | 3.23  | 2.90   | 0.20   | 14.90  | 29 | 7.47                | 6.07  | 5.70   | 0.10   | 25.40  | 54  | 0.001  |
| Shoulder height difference LEFT [mm]       | 13.72                | 8.37  | 14.00  | 0.70   | 32.80  | 42 | 11.06               | 7.82  | 9.75   | 0.10   | 41.80  | 104 | 0.070  |
| Lateral inclination LEFT [degree]          | 0.98                 | 1.16  | 0.50   | 0.00   | 4.90   | 71 | 0.62                | 0.90  | 0.10   | 0.00   | 5.10   | 158 | 0.025  |
| Lateral inclination RIGHT [degree]         | 0.31                 | 0.66  | 0.00   | 0.00   | 2.90   | 71 | 0.60                | 0.91  | 0.00   | 0.00   | 4.50   | 159 | 0.008  |
| <b>Body composition</b>                    |                      |       |        |        |        |    |                     |       |        |        |        |     |        |
| Right Leg FAT [%]                          | 29.99                | 5.55  | 29.60  | 8.50   | 48.30  | 71 | 31.19               | 4.74  | 30.90  | 22.40  | 48.40  | 159 | 0.092  |
| Left Leg FAT [%]                           | 30.64                | 4.90  | 29.80  | 23.80  | 50.30  | 71 | 31.46               | 4.77  | 31.10  | 23.10  | 49.60  | 159 | 0.234  |
| Right Arm FAT [%]                          | 33.18                | 5.56  | 32.50  | 26.10  | 57.80  | 71 | 32.92               | 4.87  | 32.70  | 16.40  | 55.30  | 159 | 0.726  |
| Left Arm FAT [%]                           | 33.69                | 5.64  | 33.30  | 26.00  | 53.70  | 71 | 35.74               | 5.99  | 35.70  | 23.10  | 61.10  | 159 | 0.016  |
| Trunk FAT [%]                              | 15.95                | 6.47  | 14.90  | 3.00   | 41.70  | 71 | 18.86               | 5.99  | 18.30  | 6.40   | 42.40  | 159 | 0.001  |
| The content of adipose tissue in % (FAT %) | 22.05                | 5.29  | 20.50  | 15.20  | 42.80  | 71 | 24.82               | 5.42  | 24.40  | 14.90  | 46.90  | 159 | <0.001 |
| Lean tissue in kg (FFM kg)                 | 77.94                | 5.31  | 79.44  | 57.14  | 84.62  | 71 | 75.18               | 5.42  | 75.58  | 53.08  | 84.97  | 159 | <0.001 |
| Total water content in % (TBW %)           | 57.06                | 3.89  | 58.06  | 41.82  | 61.99  | 71 | 55.03               | 3.97  | 55.33  | 38.81  | 62.27  | 159 | <0.001 |
| Muscle tissue in kg (PMM kg)               | 73.82                | 5.01  | 75.40  | 54.17  | 80.09  | 71 | 71.32               | 5.12  | 71.72  | 50.41  | 80.67  | 159 | <0.001 |

*p* - t-test for independent groups (taking into account the correction resulting from the homogeneity of variance (homogeneity was calculated using Levene's test))

**Supplementary Table 5.** Differences in boy's body posture and body composition parameters before and after puberty.

| Variables                                  | Boys before puberty |       |        |        |        |     | Boys after puberty |       |        |        |        |     | p      |
|--------------------------------------------|---------------------|-------|--------|--------|--------|-----|--------------------|-------|--------|--------|--------|-----|--------|
|                                            | ×                   | SD    | Me     | Min.   | Max.   | N   | ×                  | SD    | Me     | Min.   | Maks.  | N   |        |
| <b>Body posture</b>                        |                     |       |        |        |        |     |                    |       |        |        |        |     |        |
| Total length [mm]                          | 387.04              | 32.96 | 385.00 | 308.00 | 486.00 | 112 | 476.97             | 38.38 | 480.50 | 377.00 | 561.00 | 122 | <0.001 |
| Thoracic Length [mm]                       | 283.65              | 25.38 | 282.50 | 217.00 | 392.00 | 112 | 335.89             | 29.22 | 335.50 | 268.00 | 404.00 | 122 | <0.001 |
| Lumbar Length [mm]                         | 76.11               | 15.99 | 74.00  | 23.00  | 110.00 | 112 | 103.96             | 16.09 | 102.00 | 54.00  | 143.00 | 122 | <0.001 |
| Pelvic torsion [degree]                    | 3.47                | 3.47  | 2.65   | 0.00   | 29.40  | 112 | 3.71               | 3.55  | 2.90   | 0.00   | 18.80  | 122 | 0.592  |
| Pelvic obliquity [degree]                  | 2.45                | 1.81  | 2.30   | 0.00   | 7.70   | 112 | 1.94               | 1.59  | 1.55   | 0.00   | 8.30   | 122 | 0.022  |
| Pelvic/shoulder obliquity [degree]         | 2.93                | 2.21  | 2.60   | 0.00   | 10.40  | 112 | 4.12               | 14.89 | 2.40   | 0.00   | 165.50 | 122 | 0.403  |
| Scapula distance RIGHT [mm]                | 42.32               | 13.10 | 41.50  | 11.00  | 84.00  | 112 | 55.93              | 13.63 | 56.50  | 26.00  | 91.00  | 122 | <0.001 |
| Scapula distance LEFT [mm]                 | 42.96               | 11.77 | 42.00  | 15.00  | 78.00  | 112 | 53.66              | 13.12 | 54.00  | 25.00  | 83.00  | 122 | <0.001 |
| Scapula distance difference [mm]           | 7.58                | 7.01  | 6.00   | 0.00   | 41.00  | 112 | 6.81               | 5.91  | 5.00   | 0.00   | 28.00  | 122 | 0.364  |
| Pelvic height difference RIGHT [mm]        | 4.92                | 6.36  | 0.30   | 0.00   | 23.20  | 112 | 4.98               | 7.53  | 0.40   | 0.00   | 37.40  | 122 | 0.950  |
| Pelvic height difference LEFT [mm]         | 4.04                | 6.65  | 0.00   | 0.00   | 32.40  | 112 | 3.93               | 6.13  | 0.00   | 0.00   | 32.80  | 122 | 0.901  |
| Shoulder height difference RIGHT [mm]      | 6.08                | 4.34  | 5.40   | 0.10   | 19.30  | 33  | 7.48               | 5.42  | 6.80   | 1.30   | 26.10  | 34  | 0.251  |
| Shoulder height difference LEFT [mm]       | 10.97               | 8.87  | 8.40   | 0.10   | 39.90  | 79  | 11.75              | 8.84  | 10.65  | 0.50   | 59.80  | 88  | 0.571  |
| Lateral inclination LEFT [degree]          | 0.86                | 1.20  | 0.10   | 0.00   | 6.20   | 112 | 0.79               | 1.06  | 0.30   | 0.00   | 6.40   | 122 | 0.638  |
| Lateral inclination RIGHT [degree]         | 0.60                | 0.92  | 0.00   | 0.00   | 4.40   | 112 | 0.54               | 0.89  | 0.00   | 0.00   | 3.60   | 122 | 0.644  |
| <b>Body composition</b>                    |                     |       |        |        |        |     |                    |       |        |        |        |     |        |
| Right Leg FAT [%]                          | 26.23               | 5.99  | 25.40  | 5.90   | 47.80  | 112 | 21.45              | 6.11  | 19.85  | 11.20  | 44.10  | 122 | 0.063  |
| Left Leg FAT [%]                           | 26.71               | 6.05  | 25.95  | 6.40   | 47.90  | 112 | 22.04              | 6.09  | 20.15  | 11.90  | 43.40  | 122 | 0.103  |
| Right Arm FAT [%]                          | 29.97               | 4.76  | 29.25  | 17.60  | 47.20  | 112 | 25.44              | 5.60  | 24.70  | 14.60  | 45.40  | 122 | 0.105  |
| Left Arm FAT [%]                           | 30.76               | 5.31  | 29.95  | 15.60  | 51.40  | 112 | 26.66              | 6.23  | 25.35  | 17.20  | 52.00  | 122 | 0.030  |
| Trunk FAT [%]                              | 14.59               | 5.55  | 13.00  | 3.00   | 34.90  | 112 | 14.93              | 6.26  | 13.20  | 5.60   | 40.50  | 122 | 0.657  |
| The content of adipose tissue in % (FAT %) | 20.03               | 5.53  | 18.55  | 6.70   | 40.70  | 112 | 18.63              | 5.91  | 16.80  | 10.50  | 41.00  | 122 | <0.001 |
| Lean tissue in kg (FFM kg)                 | 79.97               | 5.55  | 81.27  | 59.22  | 93.21  | 112 | 81.23              | 6.22  | 83.18  | 59.05  | 89.35  | 122 | <0.001 |
| Total water content in % (TBW %)           | 58.54               | 4.06  | 59.56  | 43.38  | 68.33  | 112 | 59.46              | 4.55  | 60.88  | 43.27  | 65.29  | 122 | <0.001 |
| Muscle tissue in kg (PMM kg)               | 75.49               | 5.18  | 76.83  | 55.97  | 87.78  | 112 | 77.08              | 5.88  | 78.98  | 56.03  | 84.54  | 122 | <0.001 |

*p* - t-test for independent groups (taking into account the correction resulting from the homogeneity of variance (homogeneity was calculated using Levene's test))

**Supplementary Table 6.** Differences in body posture and body composition parameters before and after puberty in all children.

| Variables                                  | All children before puberty |       |        |        |        |          | All children after puberty |       |        |        |        |          | <i>p</i> |
|--------------------------------------------|-----------------------------|-------|--------|--------|--------|----------|----------------------------|-------|--------|--------|--------|----------|----------|
|                                            | ×                           | SD    | Me     | Min.   | Max.   | <i>N</i> | ×                          | SD    | Me     | Min.   | Maks.  | <i>N</i> |          |
| <b>Body posture</b>                        |                             |       |        |        |        |          |                            |       |        |        |        |          |          |
| Total length [mm]                          | 382.09                      | 31.97 | 380.00 | 308.00 | 486.00 | 183      | 461.83                     | 37.38 | 461.00 | 358.00 | 561.00 | 281      | <0.001   |
| Thoracic Length [mm]                       | 279.75                      | 24.99 | 278.00 | 176.00 | 392.00 | 183      | 326.21                     | 29.45 | 326.00 | 241.00 | 404.00 | 281      | <0.001   |
| Lumbar Length [mm]                         | 75.01                       | 15.86 | 74.00  | 23.00  | 110.00 | 183      | 99.93                      | 15.97 | 100.00 | 51.00  | 143.00 | 281      | <0.001   |
| Pelvic torsion [degree]                    | 3.88                        | 3.62  | 3.00   | 0.00   | 29.40  | 183      | 3.51                       | 3.30  | 2.80   | 0.00   | 21.00  | 281      | 0.264    |
| Pelvic obliquity [degree]                  | 2.39                        | 1.93  | 2.00   | 0.00   | 8.10   | 183      | 1.93                       | 1.64  | 1.50   | 0.00   | 8.50   | 281      | 0.008    |
| Pelvic/shoulder obliquity [degree]         | 2.74                        | 2.10  | 2.30   | 0.00   | 10.40  | 183      | 3.11                       | 9.92  | 2.00   | 0.00   | 165.50 | 281      | 0.617    |
| Scapula distance RIGHT [mm]                | 40.97                       | 13.11 | 41.00  | 10.00  | 84.00  | 183      | 49.62                      | 14.08 | 50.00  | 10.00  | 91.00  | 281      | <0.001   |
| Scapula distance LEFT [mm]                 | 45.70                       | 49.42 | 41.00  | 14.00  | 688.00 | 183      | 47.95                      | 13.82 | 48.00  | 15.00  | 89.00  | 281      | 0.470    |
| Scapula distance difference [mm]           | 7.56                        | 6.89  | 6.00   | 0.00   | 41.00  | 183      | 6.73                       | 5.61  | 5.00   | 0.00   | 28.00  | 281      | 0.156    |
| Pelvic height difference RIGHT [mm]        | 3.74                        | 5.55  | 0.00   | 0.00   | 23.20  | 183      | 4.84                       | 7.24  | 0.80   | 0.00   | 37.40  | 280      | 0.065    |
| Pelvic height difference LEFT [mm]         | 4.65                        | 6.95  | 1.00   | 0.00   | 32.40  | 183      | 3.71                       | 6.08  | 0.00   | 0.00   | 32.80  | 281      | 0.136    |
| Shoulder height difference RIGHT [mm]      | 5.08                        | 3.98  | 4.15   | 0.10   | 19.30  | 62       | 7.47                       | 5.80  | 6.50   | 0.10   | 26.10  | 88       | 0.003    |
| Shoulder height difference LEFT [mm]       | 11.93                       | 8.76  | 9.10   | 0.10   | 39.90  | 121      | 11.38                      | 8.29  | 10.30  | 0.10   | 59.80  | 192      | 0.579    |
| Lateral inclination LEFT [degree]          | 0.91                        | 1.18  | 0.30   | 0.00   | 6.20   | 183      | 0.70                       | 0.98  | 0.20   | 0.00   | 6.40   | 280      | 0.048    |
| Lateral inclination RIGHT [degree]         | 0.49                        | 0.84  | 0.00   | 0.00   | 4.40   | 183      | 0.57                       | 0.90  | 0.00   | 0.00   | 4.50   | 281      | 0.288    |
| <b>Body composition</b>                    |                             |       |        |        |        |          |                            |       |        |        |        |          |          |
| Right Leg FAT [%]                          | 27.69                       | 6.09  | 26.90  | 5.90   | 48.30  | 183      | 26.96                      | 7.23  | 27.80  | 11.20  | 48.40  | 281      | 0.246    |
| Left Leg FAT [%]                           | 28.23                       | 5.93  | 27.30  | 6.40   | 50.30  | 183      | 27.37                      | 7.12  | 27.90  | 11.90  | 49.60  | 281      | 0.157    |
| Right Arm FAT [%]                          | 31.21                       | 5.30  | 30.10  | 17.60  | 57.80  | 183      | 29.67                      | 6.38  | 30.30  | 14.60  | 55.30  | 281      | 0.005    |
| Left Arm FAT [%]                           | 31.89                       | 5.61  | 30.70  | 15.60  | 53.70  | 183      | 31.79                      | 7.57  | 31.80  | 17.20  | 61.10  | 281      | 0.870    |
| Trunk FAT [%]                              | 15.11                       | 5.95  | 13.60  | 3.00   | 41.70  | 183      | 17.16                      | 6.41  | 16.40  | 5.60   | 42.40  | 281      | <0.001   |
| The content of adipose tissue in % (FAT %) | 20.81                       | 5.52  | 19.60  | 6.70   | 42.80  | 183      | 22.13                      | 6.42  | 21.70  | 10.50  | 46.90  | 281      | 0.019    |
| Lean tissue in kg (FFM kg)                 | 79.18                       | 5.53  | 80.41  | 57.14  | 93.21  | 183      | 77.81                      | 6.50  | 78.36  | 53.08  | 89.35  | 281      | 0.015    |
| Total water content in % (TBW %)           | 57.97                       | 4.05  | 58.80  | 41.82  | 68.33  | 183      | 56.96                      | 4.76  | 57.30  | 38.81  | 65.29  | 281      | 0.015    |
| Muscle tissue in kg (PMM kg)               | 74.85                       | 5.16  | 75.97  | 54.17  | 87.78  | 183      | 73.82                      | 6.16  | 74.16  | 50.41  | 84.54  | 281      | 0.054    |

*p* - t-test for independent groups (taking into account the correction resulting from the homogeneity of variance (homogeneity was calculated using Levene's test))
